# Supplementary material for: A Balanced Dietary Ratio of n-6:n-3 Polyunsaturated Fatty Acids Exerts an Effect on Total Fatty Acid Profile in RBCs and Inflammatory Markers in Subjects with Obesity
Source: MDPI journal article supplement (doi:10.3390/healthcare11162333), 2023-08-18
Supplement: s1 [file s1]

## Supplementary material

| Variable                  | p-value      | Rank | q-value | Discovery? |
|---------------------------|--------------|------|---------|------------|
| Weight (kg)               | <b>0.008</b> | 1    | 0.216   | yes        |
| Lean body mass (kg)       | <b>0.012</b> | 2    | 0.216   | yes        |
| BMI (kg/m <sup>2</sup> )  | <b>0.013</b> | 3    | 0.216   | yes        |
| Water (kg)                | <b>0.029</b> | 4    | 0.300   | yes        |
| LDL-c (mg/dL)             | <b>0.030</b> | 5    | 0.300   | yes        |
| SM (kg)                   | 0.052        | 6    | 0.406   | no         |
| BFM (kg)                  | 0.062        | 7    | 0.406   | no         |
| Protein (%)               | 0.065        | 8    | 0.406   | no         |
| PUFA (%)                  | 0.088        | 9    | 0.425   | no         |
| 20:4 AA (g)               | 0.091        | 10   | 0.425   | no         |
| IL-8 (pg/mL)              | 0.097        | 11   | 0.425   | no         |
| AA (%)                    | 0.102        | 12   | 0.425   | no         |
| Linoleic LA (g)           | 0.111        | 13   | 0.426   | no         |
| Linolenic ALA (g)         | 0.158        | 14   | 0.535   | no         |
| TG (mg/dL)                | 0.173        | 15   | 0.535   | no         |
| Insulin (μU/mL)           | 0.179        | 16   | 0.535   | no         |
| IL-6 (pg/mL)              | 0.182        | 17   | 0.535   | no         |
| DHA (g)                   | 0.195        | 18   | 0.541   | no         |
| HOMA-IR                   | 0.206        | 19   | 0.542   | no         |
| WC (cm)                   | 0.229        | 20   | 0.557   | no         |
| DPA (%)                   | 0.234        | 21   | 0.557   | no         |
| IL-13 (pg/mL)             | 0.268        | 22   | 0.571   | no         |
| VLDL-c (mg/dL)            | 0.275        | 23   | 0.571   | no         |
| EPA (g)                   | 0.282        | 24   | 0.571   | no         |
| IL-12 (pg/mL)             | 0.286        | 25   | 0.571   | no         |
| Energy (kcal)             | 0.297        | 26   | 0.571   | no         |
| Fat (%)                   | 0.343        | 27   | 0.634   | no         |
| Total n-6 (%)             | 0.361        | 28   | 0.634   | no         |
| Lipids (%)                | 0.368        | 29   | 0.634   | no         |
| Total cholesterol (mg/dL) | 0.406        | 30   | 0.676   | no         |
| α linolenic acid (%)      | 0.437        | 31   | 0.693   | no         |
| Total sugar (g)           | 0.444        | 32   | 0.693   | no         |
| Cholesterol (mg)          | 0.466        | 33   | 0.706   | no         |
| Total n-3 (%)             | 0.569        | 34   | 0.836   | no         |

|                      |       |    |       |    |
|----------------------|-------|----|-------|----|
| 22:5 DPA (g)         | 0.596 | 35 | 0.851 | no |
| MUFA (%)             | 0.618 | 36 | 0.858 | no |
| HDL-c (mg/dL)        | 0.728 | 37 | 0.910 | no |
| EPA (%)              | 0.732 | 38 | 0.910 | no |
| MIP1 $\beta$ (pg/mL) | 0.757 | 39 | 0.910 | no |
| MCP-1(pg/mL)         | 0.760 | 40 | 0.910 | no |
| INF $\gamma$ (pg/mL) | 0.764 | 41 | 0.910 | no |
| Adiponectin (ug/mL)  | 0.765 | 42 | 0.910 | no |
| Carbohydrates (%)    | 0.803 | 43 | 0.933 | no |
| SFA (%)              | 0.840 | 44 | 0.933 | no |
| tFA (g)              | 0.840 | 45 | 0.933 | no |
| Total PUFAs (%)      | 0.874 | 46 | 0.950 | no |
| Glucose (mg/dL)      | 0.911 | 47 | 0.969 | no |
| DHA (%)              | 0.956 | 48 | 0.981 | no |
| Abdominal fat (kg)   | 0.977 | 49 | 0.981 | no |
| Linoleic acid (%)    | 0.981 | 50 | 0.981 | no |
